# Supplementary material for: Enhancing the performance of MnO by double carbon modification for advanced lithium-ion battery anodes
Source: Royal Society of Chemistry journal article supplement (doi:10.1039/c5ta06095h), 2015-12-09
Supplement: c5ta06095h1.pdf [file c5ta06095h1.pdf]

## Supporting information

### **Enhancing the performance of MnO by double carbon modification for advanced lithium-ion battery anode**

Xiaojian Jiang,<sup>b</sup> Wei Yu,<sup>c</sup> Hui Wang,<sup>d</sup> Huayun Xu,<sup>c</sup> Xizheng Liu,<sup>a\*</sup> and Yi Ding<sup>a\*</sup>

*<sup>a</sup> Institute for New Energy Materials and Low-Carbon Technologies, and School of Materials Science and Engineering, Tianjin University of Technology, Tianjin 300384, P.R. China*

*<sup>b</sup> Xiamen Products Quality Supervision & Inspection Institute, Xiamen 361004, P.R. China*

*<sup>c</sup> Center for Advanced Energy Materials & Technology Research (AEMT), and School of Chemistry and Chemical Engineering, Shandong University, Jinan 250100, P.R. China*

*<sup>d</sup> Environmental Protection Administration of Linyi, Linyi Shandong 276000, P.R. China*

*\*Corresponding authors:*

*Dr. Xizheng Liu [xzliu@tjut.edu.cn](mailto:xzliu@tjut.edu.cn)*

*Prof. Dr. Yi Ding [yding@tjut.edu.cn](mailto:yding@tjut.edu.cn)*

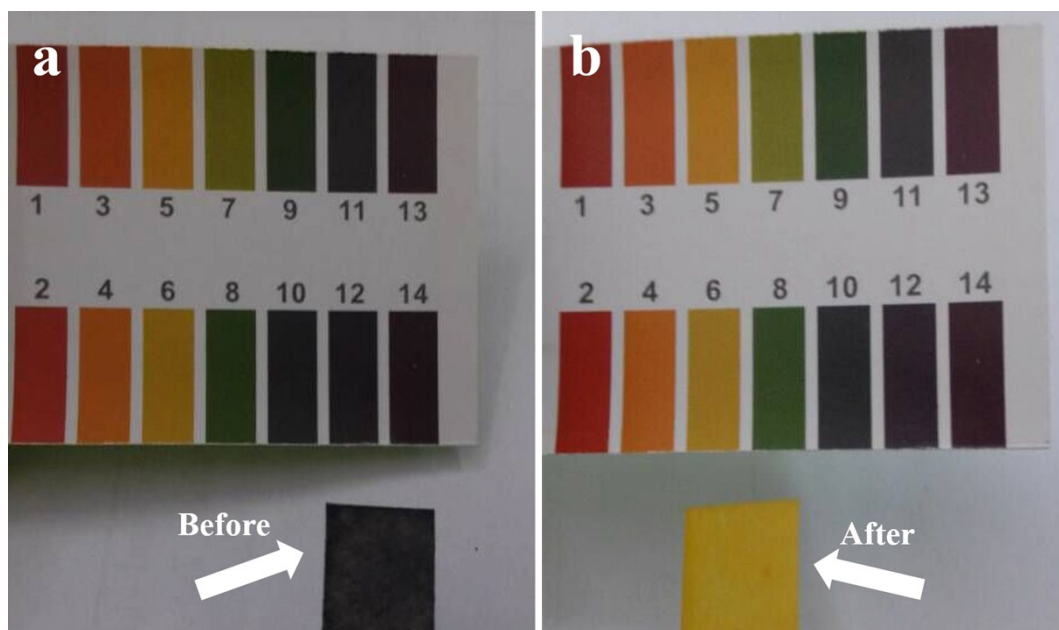

**Fig. S1.** The colour changes of pH before and after sodium hydroxide produced was washed by ultra-pure water.

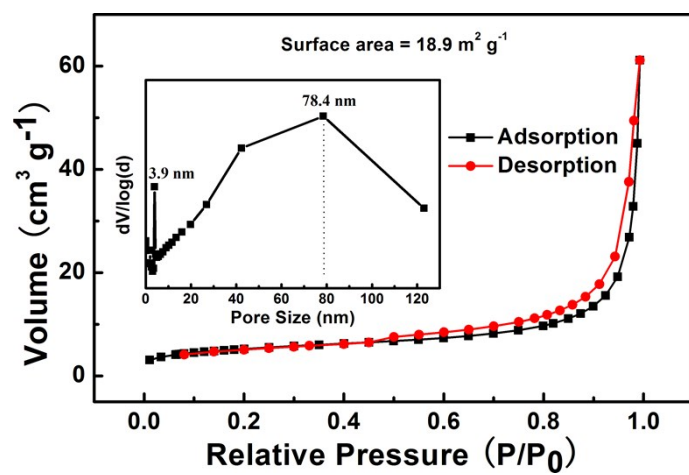

**Fig. S2.** The nitrogen adsorption-desorption isotherms of porous MnO@C/CNTs.

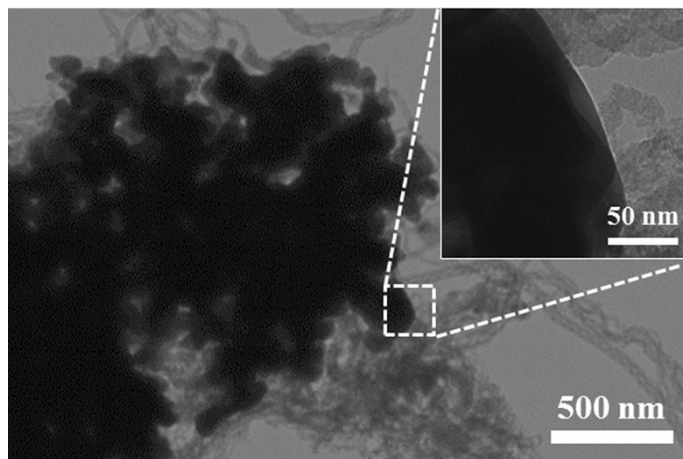

**Fig. S3.** TEM image of MnO/CNTs.

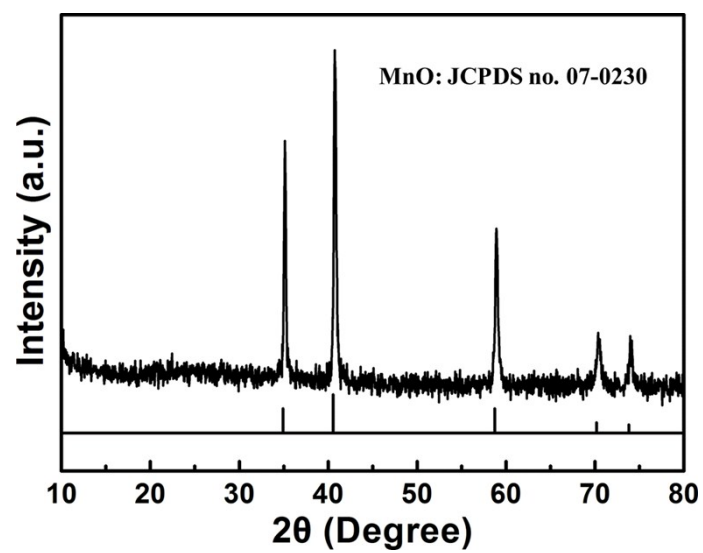

Fig. S4. XRD pattern of MnO/CNTs.

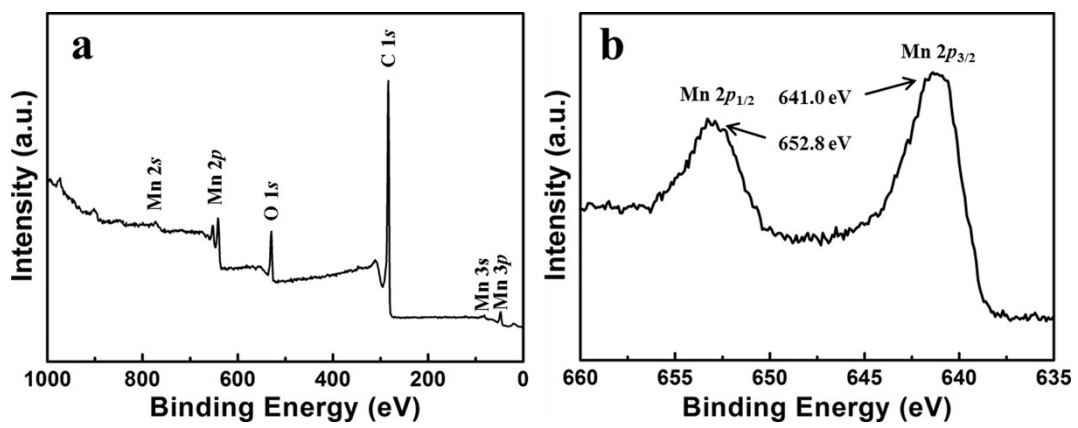

**Fig. S5.** XPS spectra of MnO@C/CNTs: (a) survey scan, (b) high-resolution Mn 2p peaks.

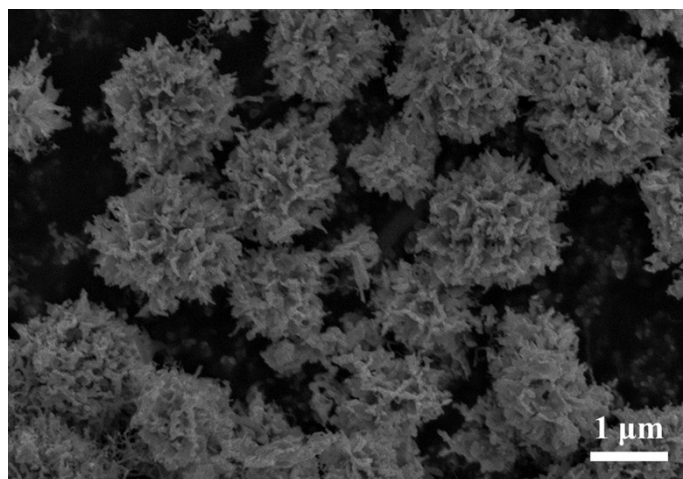

**Fig. S6.** SEM of porous MnO@C/CNTs.

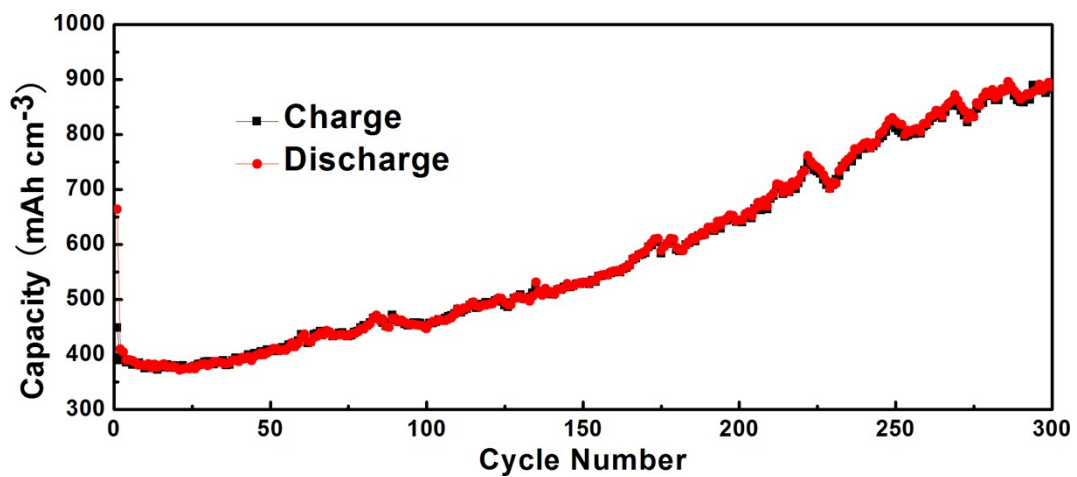

**Fig. S7.** Cycling volumetric capacity performance of porous MnO@C/CNTs at different cycles with a current density of 200 mA g<sup>-1</sup> in the range of 0.05-3.0 V.



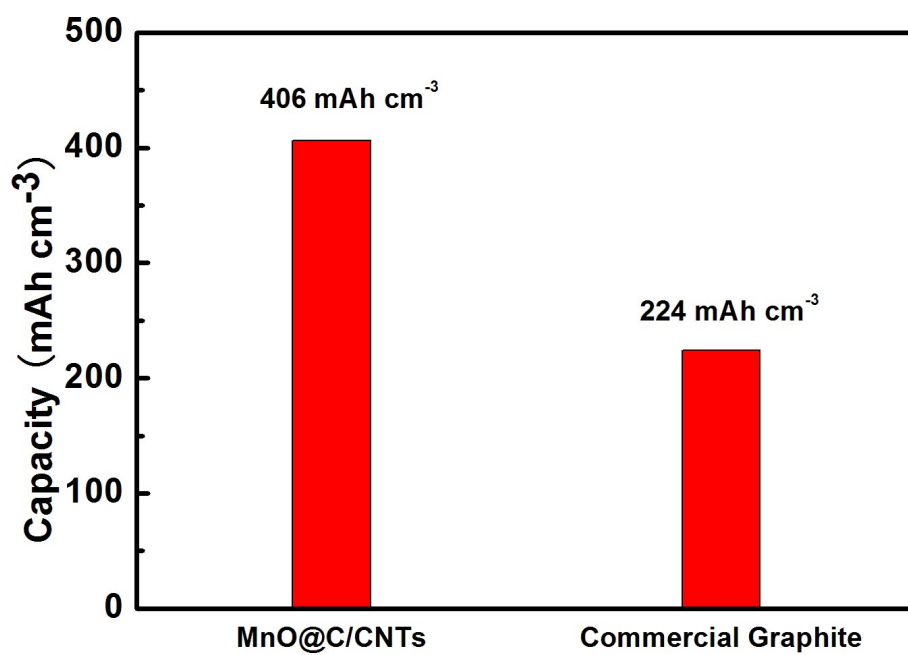

**Fig. S8.** Discharge capacities of MnO@C/CNTs and commercial graphite electrodes at 200 mA g<sup>-1</sup> after 20 cycles.

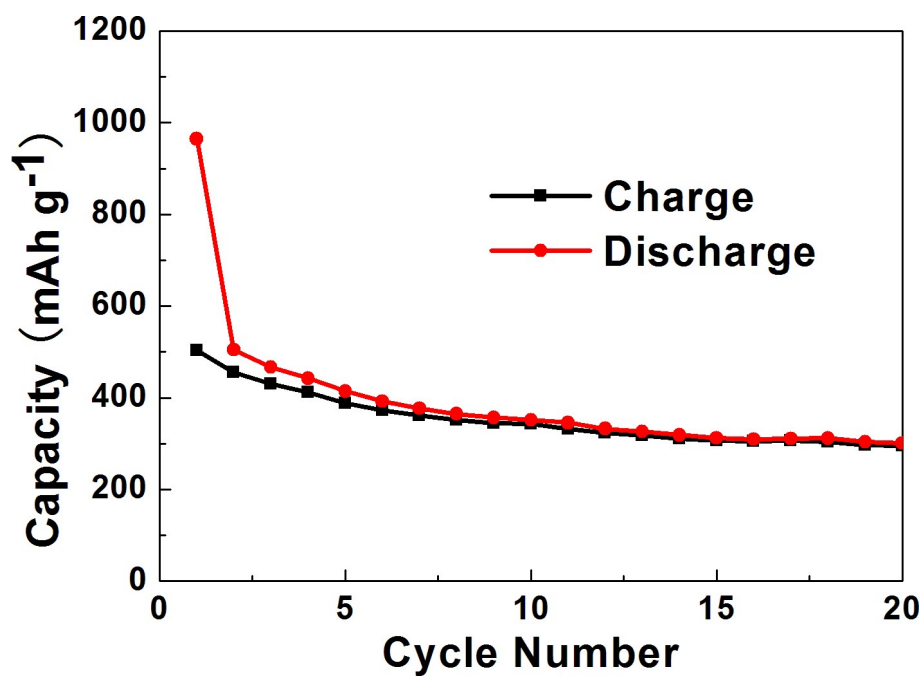

**Fig. S9.** Cycling performance of porous MnO@C/CNTs at different cycles with a current density of 200 mA g<sup>-1</sup> in the range of 0.05-1.5 V.

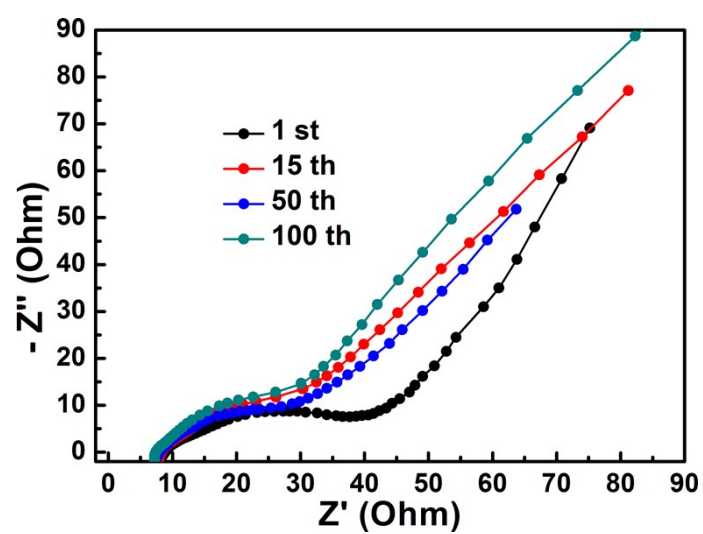

**Fig. S10.** Nyquist plots of porous MnO@C/CNTs electrodes charged to 3 V after different discharge/charge cycles at 500 mA g<sup>-1</sup>.

**Table S1.** Comparison of cycling performances of MnO-based anode materials.

| MnO-based anode materials            | Current density        | Cycle number | After cycle capacity (mA h g <sup>-1</sup> ) | Ref.      | Year      |
|--------------------------------------|------------------------|--------------|----------------------------------------------|-----------|-----------|
| MnO/graphene oxide sheet             | 100 mA g <sup>-1</sup> | 50           | 665.5                                        | 38        | 2012      |
| MnO@C Nanowires                      | 500 mA g <sup>-1</sup> | 200          | 801                                          | 19        | 2013      |
| Mesoporous MnO/C Networks            | 200 mA g <sup>-1</sup> | 200          | 1224                                         | 29        | 2013      |
| Porous MnO/C microspheres            | 100 mA g <sup>-1</sup> | 50           | 700                                          | 11        | 2013      |
| MnO/MWNTs composite rods             | 310 mA g <sup>-1</sup> | 200          | 455                                          | 17        | 2013      |
| Porous MnO@C microspheres            | 100 mA g <sup>-1</sup> | 100          | 525.4                                        | 9         | 2014      |
| MnO/Carbon Nanopeapods               | 500 mA g <sup>-1</sup> | 100          | 1119                                         | 8         | 2014      |
| MnO/MWNTs composite sphere           | 130 mA g <sup>-1</sup> | 200          | 597                                          | 22        | 2014      |
| Peanut-like MnO@C composites         | 200 mA g <sup>-1</sup> | 200          | 952                                          | 39        | 2014      |
| Hollow MnO nanospheres               | 500 mA g <sup>-1</sup> | 150          | 1050                                         | 32        | 2014      |
| MnO nanowire/graphene                | 500 mA g <sup>-1</sup> | 470          | 930                                          | 21        | 2014      |
| Porous MnO <sub>x</sub> microspheres | 500 mA g <sup>-1</sup> | 100          | 757                                          | 12        | 2015      |
| Porous MnO@C/CNTs                    | 200 mA g <sup>-1</sup> | 300          | 1453                                         | this work | this work |
| Porous MnO@C/CNTs                    | 500 mA g <sup>-1</sup> | 300          | 1266                                         | this work | this work |
